# Supplementary material for: Direct generation of hydrogen peroxide from formic acid and O2 using heterogeneous Pd/γ-Al2O3 catalysts
Source: Royal Society of Chemistry journal article supplement (doi:10.1039/b803149e), 2008-01-01
Supplement: b803149e.pdf [file b803149e.pdf]

## SUPPLEMENTARY INFORMATION

### Direct generation of hydrogen peroxide from formic acid and O<sub>2</sub> using heterogeneous Pd/ $\gamma$ -Al<sub>2</sub>O<sub>3</sub> catalysts

Mohammad S. Yalfani, Sandra Contreras, Francesc Medina\* and Jesus Sueiras

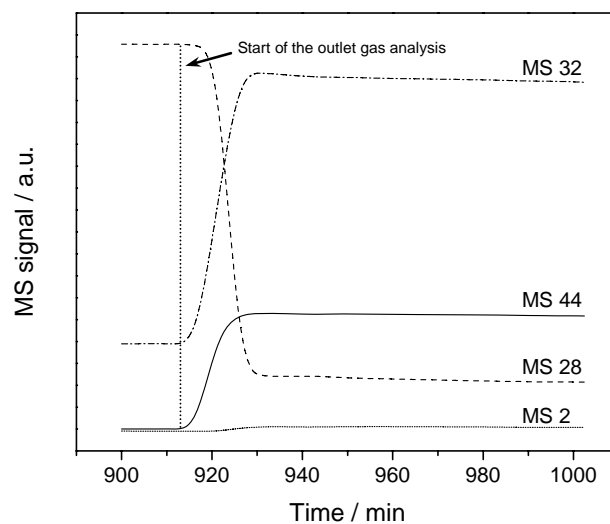

**Figure 1S** MS profile of the outlet gases during generation of hydrogen peroxide from formic acid and O<sub>2</sub> over Pd/ $\gamma$ -Al<sub>2</sub>O<sub>3</sub>

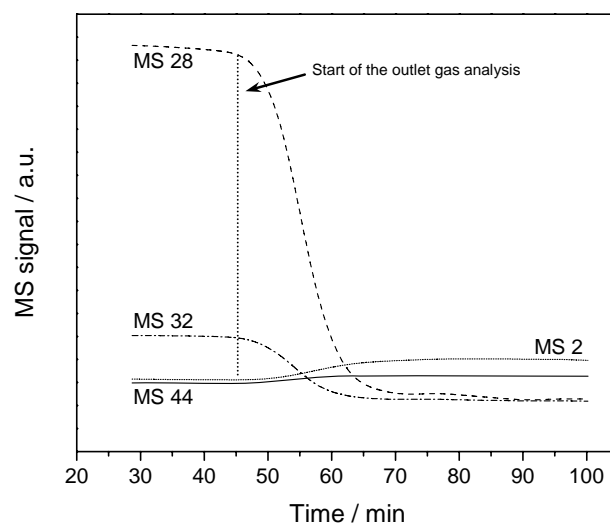

**Figure 2S** MS profile of the outlet gases during decomposition of formic acid over Pd/ $\gamma$ -Al<sub>2</sub>O<sub>3</sub> in Ar atmosphere
